# Supplementary material for: Non-doped organic light-emitting diodes based on phenanthroimidazole-triphenylamine derivatives with a low efficiency roll-off of 9% at a high luminance of 10 000 cd m−2
Source: Royal Society of Chemistry journal article supplement (doi:10.1039/d0tc03379k), 2020-01-01
Supplement: d0tc03379k1.pdf [file d0tc03379k1.pdf]

## Supporting Information

### **Non-doped organic light-emitting diodes based on phenanthroimidazole-triphenylamine derivatives with a low efficiency roll-off of 9% at a high luminance of 10000 cd m<sup>-2</sup>**

Chunya Du, Futong Liu, Hui Liu, Xin He, Dongyan Jiang, Zijun Feng, Lei Gao, and  
Ping Lu\*

State Key Laboratory of Supramolecular Structure and Materials, Department of  
Chemistry, Jilin University, Qianjin Street No. 2699, Changchun, 130012, P. R. China

\*Corresponding authors:

E-mail: [lup@jlu.edu.cn](mailto:lup@jlu.edu.cn)

### **Table of Contents**

|                                       |     |
|---------------------------------------|-----|
| 1. Experimental Section .....         | S2  |
| 2. Synthesis Process .....            | S4  |
| 3. Photophysical Properties .....     | S10 |
| 4. Theoretical Calculations .....     | S14 |
| 5. Electroluminescence Property ..... | S17 |

# 1. Experimental Section

## General Information

All the reagents and solvents used for the synthesis and characterization were purchased and used without further purification. The  $^1\text{H}$  NMR data were recorded on a Bruker AVANCE 500 spectrometer at 500 MHz, using tetramethylsilane (TMS) as the internal standard. The MALDI-TOF-MS mass spectra were measured using an AXIMA-CFRTM plus instrument. Thermal gravimetric analysis (TGA) was measured on a Perkin-Elmer thermal analysis system from 30 °C to 900 °C at a heating rate of 10 K/min under nitrogen flow rate of 80 mL/min. Differential scanning calorimetry (DSC) was performed on a NETZSCH (DSC-204) unit from 50 °C to 360 °C at a heating rate of 10 K/min under nitrogen atmosphere. The electrochemical properties (oxidation and reduction potentials) were carried out via cyclic voltammetry (CV) measurements by using a standard one-compartment, three-electrode electro-chemical cell given by a BAS 100B/W electrochemical analyzer. Tetrabutylammonium-hexafluorophosphate ( $\text{TBAPF}_6$ ) in anhydrous dimethylformamide (DMF) or anhydrous dichloromethane (0.1 M) were used as the electrolyte for negative or positive scan. A glass-carbon disk electrode was used as the working electrode, a Pt wire as the counter electrode,  $\text{Ag}/\text{Ag}^+$  as the reference electrode together with ferrocene as the internal standard at the scan rate of 50 mV/s. The HOMO/LUMO levels were calculated according to the following formalism:

$$E_{\text{HOMO}} = - (E_{\text{OX}} \text{ vs. Fc/Fc}^+ + 4.8) \text{ eV}$$

$$E_{\text{LUMO}} = - (E_{\text{red}} \text{ vs. Fc/Fc}^+ + 4.8) \text{ eV}$$

UV-vis, fluorescence spectra and PLQY ( $\Phi_{\text{F}}$ ) were recorded on a Shimadzu UV-3100 spectrophotometer using 1 cm path length quartz cells. The fluorescence lifetimes were measured by FLS920 Spectrometer. The  $\Phi_{\text{F}}$  of different solutions were determined by using 0.1 M quinine sulfate as a reference ( $\Phi_{\text{F}} = 0.546$ ) and were calculated by using the following formula:

$$Q_x = Q_r \left( \frac{A_r(\lambda_r)}{A_x(\lambda_x)} \right) \left( \frac{I(\lambda_r)}{I(\lambda_x)} \right) \left( \frac{n_x^2}{n_r^2} \right) \left( \frac{D_x}{D_r} \right)$$

Where  $Q$  is the PLQY,  $A$  is the value of absorbance,  $I$  is the intensity of excitation source,  $n$  is the refractive index of solvent,  $D$  is the area of emission spectra,  $\lambda$  is the corresponding wavelength.

The subscript r stands for the reference while  $x$  stands for test subject. The excitation wavelength was 375 nm and 380 nm for TPPI-BZPCN and TPPI-AQ respectively.

## Device Fabrication

ITO coated glass was used as the substrate and the sheet resistance was  $20 \Omega \text{ square}^{-1}$ . The ITO glass substrates were cleaned with isopropanol, alcohol, acetone, toluene and deionized water, dried in an oven at  $120^\circ\text{C}$ , treated with UV-zone for 20 min, and finally transferred to a vacuum deposition system with a base pressure lower than  $5 \times 10^{-6}$  mbar for organic and metal deposition. The hole injecting HAT-CN layer (6 nm) was deposited at a rate of  $0.1 \text{ \AA s}^{-1}$ . The deposition rate of all organic layers was  $1.0 \text{ \AA s}^{-1}$ . The cathode LiF (1 nm) was deposited at a rate of  $0.1 \text{ \AA s}^{-1}$  and then the capping Al metal layer (100 nm) was deposited at a rate of  $4.0 \text{ \AA s}^{-1}$ . The electroluminescent (EL) characteristics were measured using a Keithley 2400 programmable electrometer and a PR-650 Spectro scan spectrometer under ambient condition at room temperature.

## Computational Details

The ground state ( $S_0$ ) and excited state ( $S_1$ ) geometries were optimized at the B3LYP/6-31G (d, p) level. The HOMO/LUMO distributions were calculated on the basis of optimized  $S_0$  state. The higher absorption and emission energy levels of both singlet and triplet states were calculated using B3LYP/6-31G (d, p) method on the basis of the optimized configuration of  $S_1$ , respectively. Natural transition orbitals (NTOs) of emission were evaluated for the ten lowest excited-states, involving both singlet and triplet states under B3LYP/6-31G (d, p) level.

## Lippert-Mataga calculation

$$hc(\nu_a - \nu_f) = hc(\nu_a^0 - \nu_f^0) - \frac{2(\mu_e - \mu_g)^2}{a^3} f(\epsilon, n)$$

$f$  is the orientational polarizability of the solvent, corresponds to the Stokes shifts when  $f$  is zero,  $\mu_e$  is the excited state dipole moment,  $\mu_g$  is the ground-state dipole moment;  $a$  is the solvent cavity (Onsager) radius, derived from the Avogadro number ( $N$ ), molecular weight ( $M$ ), and density ( $d = 1.0 \text{ g/cm}^3$ );  $\epsilon$  and  $n$  are the solvent dielectric and the solvent refractive index, respectively;  $a$  and  $f(\epsilon, n)$  can be calculated respectively as follows:

$$f(\epsilon, n) = \frac{\epsilon - 1}{2\epsilon + 1} - \frac{n^2 - 1}{2n^2 + 1}$$

$$a = (3M/4N\pi l)^{1/3}$$

The detailed data are listed in **Table S1**. The Stokes shift ( $\nu_a - \nu_f$ ) of TPPI-BZPCN and TPPI-AQ are in linear relationship with the solvent polarity  $f$  as presented in **Fig. S11**.

## 2. Synthesis Process

### BrBZPCN

4,7-Dibromobenzo[c] [1, 2, 5] thiadiazole (4.41 g, 15 mmol), (4-cyanophenyl) boronic acid (2.30 g, 10 mmol), Pd(PPh<sub>3</sub>)<sub>4</sub> (0.30 mmol, 0.30 g), K<sub>2</sub>CO<sub>3</sub> (6.00 g, 40 mmol), distilled water (20 mL), and toluene (40 mL) were first mixed. The mixture was heated and refluxed at 90 °C under a nitrogen atmosphere for 36 h. After cooling to room temperature, the mixture was washed by water and extracted with dichloromethane consecutively. The product was then further dried with MgSO<sub>4</sub> and purified by column chromatography on silica gel using a petroleum ether/dichloromethane mixture (4:1) as the eluent. <sup>1</sup>H NMR (500 MHz, DMSO-D<sub>6</sub>)  $\delta$  (ppm): 8.23 - 8.15 (m, 3H), 8.04 (d,  $J$  = 8.5 Hz, 2H), 7.91 (d,  $J$  = 7.6 Hz, 1H). MS (MALDI-TOF),  $m/z$ : [M<sup>+</sup>] Calcd for C<sub>13</sub>H<sub>6</sub>BrN<sub>3</sub>S, 316.68; Found, 316.18.

### TPA-NO<sub>2</sub>

1-Fluoro-4-nitrobenzene (8.40 g, 60 mmol), diphenylamine (8.45 g, 50 mmol), caesium fluoride (15.21 g, 0.10 mol) and dimethyl sulfoxide (120 mL) were added and refluxed at 140 °C under N<sub>2</sub> atmosphere for 6 h. After the reaction, the mixture was poured into water and cooled by ice. And then, it was filtered and an orange solid was obtained. The solid was recrystallized in ethanol twice and dried to obtain the product without any further purification. MS (MALDI-TOF),  $m/z$ : [M<sup>+</sup>] Calcd for C<sub>18</sub>H<sub>16</sub>N<sub>2</sub>O<sub>2</sub>, 290.32; Found, 290.80

### TPA-NH<sub>2</sub>

TPA-NO<sub>2</sub> (5.86 g, 20 mmol), SnCl<sub>2</sub>·2H<sub>2</sub>O (27.05 g, 120 mmol), and ethyl alcohol (120 mL) were mixed and refluxed at 70 °C under N<sub>2</sub> atmosphere for 100 min. After cooling to room temperature, the mixture was quenched by sodium hydroxide solution and extracted with dichloromethane consecutively. Afterwards, the dichloromethane was removed by distillation and get the product, without any further purification. MS (MALDI-TOF),  $m/z$ : [M<sup>+</sup>] Calcd for C<sub>18</sub>H<sub>16</sub>N<sub>2</sub>, 260.34; Found, 260.43

## TPPIBr

TPPIBr was synthesized in a one-pot reaction. The mixtures of phenanthrenequinone (2.10 g, 10 mmol), TPA-NH<sub>2</sub> (10.00 g, 40 mmol), ammonium acetate (4.01 g, 50 mmol), 4-bromobenzaldehyde (1.85 g, 10 mmol) and acetic acid (50 mL) were reacted in acetic acid at 120 °C under N<sub>2</sub> atmosphere for 2 h. After the reaction, the mixture was poured into water and cooled by ice. And then, it was filtered and the crude product was obtained, washed with acetic acid, water, and ethyl alcohol in turn, then purified through chromatography to give TPPIBr as light-yellow powder with good yield. <sup>1</sup>H NMR (500 MHz, DMSO-D<sub>6</sub>) δ (ppm): 8.95 (d, J = 8.3 Hz, 1H), 8.89 (d, J = 8.2 Hz, 1H), 8.68 (d, J = 7.1 Hz, 1H), 7.77 (d, J = 7.1 Hz, 1H), 7.72 - 7.66 (m, 3H), 7.62 (t, J = 8.1 Hz, 3H), 7.53 (dd, J = 16.3, 8.4 Hz, 3H), 7.48-7.40 (m, 4H), 7.38 (d, J = 7.7 Hz, 1H), 7.23 (d, J = 7.6 Hz, 4H), 7.20 - 7.12 (m, 4H). MS (MALDI-TOF), m/z: [M<sup>+</sup>] Calcd for C<sub>39</sub>H<sub>26</sub>BrN<sub>3</sub>, 616.56; Found, 616.43.

## TPPIB

KOAc (1.50 g, 15 mmol), PPIBr (3.00 g, 5 mmol), bis(pinacolato)diboron (2.53 g, 10 mmol), Pd(dppf)Cl<sub>2</sub> (0.12 g, 0.15 mmol) and dioxane (30 mL) were first mixed. The mixture was heated by 90 °C and refluxed under a nitrogen atmosphere for 48 h. After cooling to room temperature, the mixture was washed by water and extracted with dichloromethane consecutively. The dichloromethane was removed by distillation. The product was then further dried with MgSO<sub>4</sub> and purified by column chromatography on silica gel using a petroleum ether/ dichloromethane mixture (1:2) as the eluent, and the pure product of TPPIB was finally obtained. <sup>1</sup>H NMR (500 MHz, DMSO-D<sub>6</sub>) δ (ppm): 8.95 (d, J = 8.2 Hz, 1H), 8.89 (d, J = 8.4 Hz, 1H), 8.69 (d, J = 6.8 Hz, 1H), 7.77 (t, J = 7.5 Hz, 1H), 7.71 (dt, J = 8.3, 7.3 Hz, 5H), 7.62 (t, J = 7.7 Hz, 1H), 7.53 (dd, J = 12.0, 5.3 Hz, 3H), 7.42 (dd, J = 17.2, 9.7 Hz, 4H), 7.39 (d, J = 7.6 Hz, 1H), 7.22 (d, J = 7.6 Hz, 4H), 7.20 - 7.11 (m, 4H), 1.34 (s, 12H). MS (MALDI-TOF), m/z: [M<sup>+</sup>] Calcd for C<sub>45</sub>H<sub>38</sub>BN<sub>3</sub>O<sub>2</sub>, 663.63; Found, 663.81.

## TPPI-AQ

TPPIB (3.31 g, 5 mmol), 2-bromoanthracene-9,10-dione (1.72 g, 6 mmol), Pd(PPh<sub>3</sub>)<sub>4</sub> (0.15 g, 0.15 mmol), K<sub>2</sub>CO<sub>3</sub> (6.00 g, 40 mmol), distilled water (20 mL), and toluene (40 mL) were first mixed. The mixture was heated by 90 °C and refluxed under a nitrogen atmosphere for 36 h. After cooling to room temperature, the mixture was washed by water and extracted with dichloromethane consecutively. The product was then further dried with MgSO<sub>4</sub> and purified by column

chromatography on silica gel using a petroleum ether/dichloromethane mixture as the eluent to obtain pure product of TPPI-AQ.  $^1\text{H}$  NMR (500 MHz, DMSO- $\text{D}_6$ )  $\delta$  (ppm): 9.58 (dd,  $J = 11.7$ , 8.2 Hz, 2H), 9.51 (d,  $J = 7.6$  Hz, 1H), 8.49 (d,  $J = 7.8$  Hz, 2H), 8.48 - 8.41 (m, 2H), 8.36 - 8.32 (m, 1H), 8.26 (d,  $J = 9.8$  Hz, 2H), 8.20 (dd,  $J = 19.9$ , 7.2 Hz, 3H), 8.05 (dd,  $J = 15.3$ , 8.9 Hz, 2H), 7.97 (s, 3H), 7.62 (d,  $J = 8.5$  Hz, 2H), 7.58-7.54 (m, 1H), 7.46-7.35 (m, 5H), 7.21 (dd,  $J = 9.9$ , 7.5 Hz, 4H), 7.16-7.11 (m, 2H), 7.08 (d,  $J = 7.3$  Hz, 1H).  $^{13}\text{C}$  NMR (126 MHz,  $\text{CDCl}_3$ )  $\delta$  (ppm): 183.48, 148.14, 147.71, 147.46, 145.86, 143.67, 143.17, 142.36, 141.89-141.05, 134.37, 131.71, 131.43, 130.98, 129.99, 129.84, 129.82, 129.09, 128.35, 128.35, 127.08, 126.99, 126.50, 126.31, 125.17, 124.81, 124.81, 124.06, 124.14, 123.49, 123.17, 122.45. MS (MALDI-TOF),  $m/z$ :  $[\text{M}^+]$  Calcd for  $\text{C}_{53}\text{H}_{33}\text{N}_3\text{O}_2$ , 743.26; Found, 743.81. Elem. Anal. Calcd for  $\text{C}_{53}\text{H}_{33}\text{N}_3\text{O}_2$ : C, 85.58; H, 4.47; N, 5.65. Found: C, 85.40; H, 4.45; N, 5.54.

### TPPI-BZPCN

TPPIB (3.30 g, 5 mmol), BrBZPCN (1.92 g, 6 mmol), Pd ( $\text{PPh}_3$ ) $_4$  (0.15 g, 0.15 mmol),  $\text{K}_2\text{CO}_3$  (6.00 g, 40 mmol), distilled water (20 mL), and toluene (40 mL) were first mixed. The mixture was heated by 90 °C and refluxed under a nitrogen atmosphere for 36 h. After cooling to room temperature, the mixture was washed by water and extracted with dichloromethane consecutively. The product was then further dried with  $\text{MgSO}_4$  and purified by column chromatography on silica gel using a petroleum ether/dichloromethane mixture as the eluent to obtain pure product of TPPI-BZPCN.  $^1\text{H}$  NMR (500 MHz, DMSO- $\text{D}_6$ )  $\delta$  (ppm): 8.97 (d,  $J = 8.3$  Hz, 1H), 8.91 (d,  $J = 8.5$  Hz, 1H), 8.73 (d,  $J = 8.0$  Hz, 1H), 8.28 (d,  $J = 8.3$  Hz, 2H), 8.14 (dt,  $J = 15.8$ , 7.9 Hz, 4H), 8.07 (d,  $J = 8.4$  Hz, 2H), 7.89 (d,  $J = 8.4$  Hz, 2H), 7.82-7.78 (m, 1H), 7.71 (t,  $J = 7.0$  Hz, 1H), 7.63 (d,  $J = 8.7$  Hz, 3H), 7.56-7.52 (m, 1H), 7.42 (dd,  $J = 13.8$ , 6.3 Hz, 5H), 7.28-7.18 (m, 6H), 7.17 (t,  $J = 7.4$  Hz, 2H).  $^{13}\text{C}$  NMR (126 MHz,  $\text{CDCl}_3$ )  $\delta$  (ppm): 153.91, 153.65, 150.33, 149.19, 147.02, 141.69, 137.29, 137.13-136.79, 132.39, 131.41, 130.92, 130.27, 129.09, 128.83, 128.77, 127.88, 127.96, 127.96, 127.27, 126.32, 125.69, 125.28, 125.01, 124.14, 123.06, 122.77, 121.00, 118.82. MS (MALDI-TOF),  $m/z$ :  $[\text{M}^+]$  Calcd for  $\text{C}_{52}\text{H}_{32}\text{N}_6\text{S}$ , 772.24; Found, 772.81. Elem. Anal. Calcd for  $\text{C}_{52}\text{H}_{32}\text{N}_6\text{S}$ : C, 80.81; H, 4.17; N, 10.87. Found: C, 80.56; H, 4.32; N, 10.19.

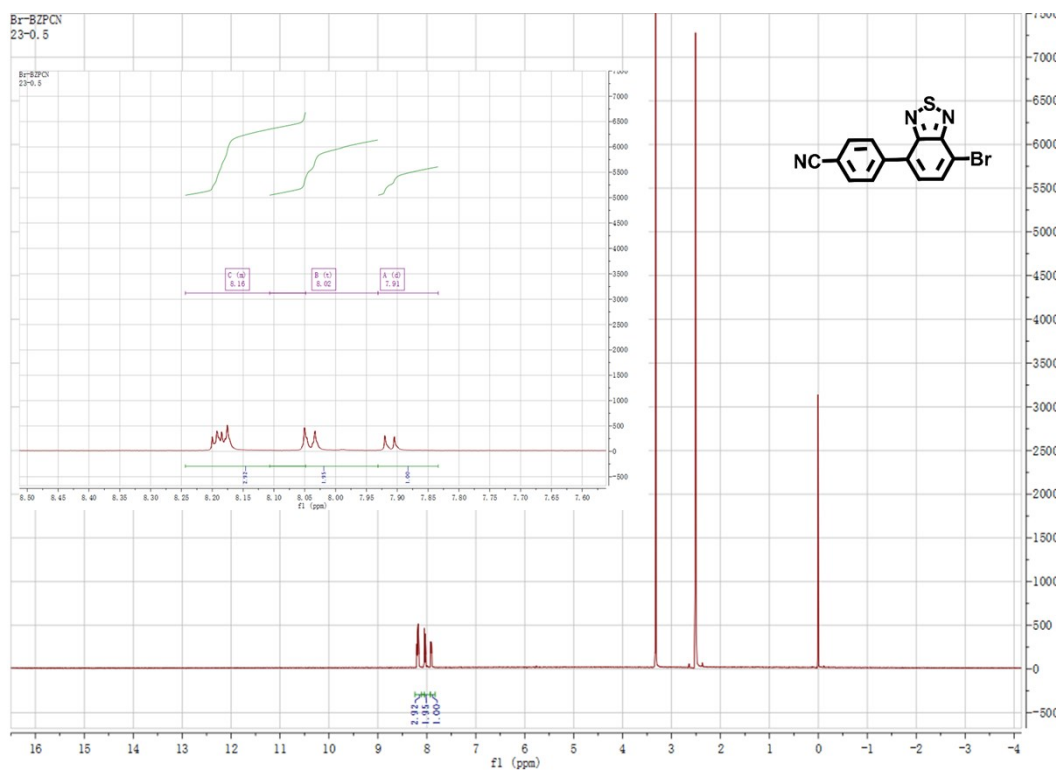

**Fig. S1**  $^1\text{H}$  NMR spectra of BZPCNBr measured in deuterated  $\text{DMSO-D}_6$ .

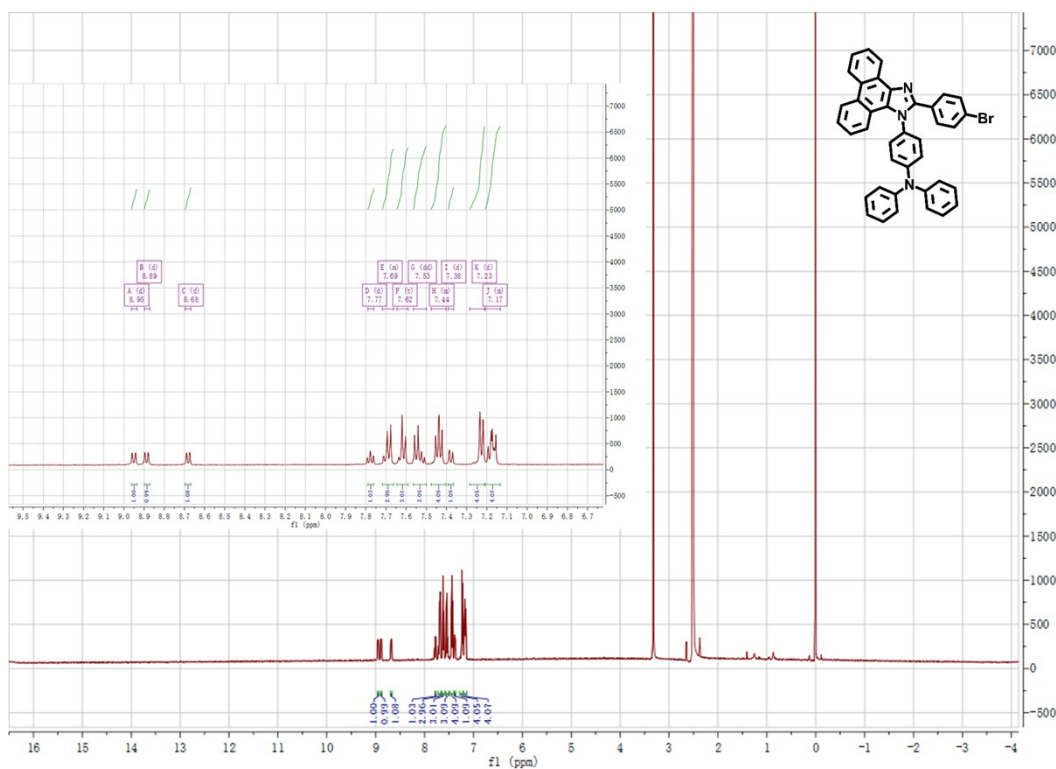

**Fig. S2**  $^1\text{H}$  NMR spectra of TPPIBr measured in deuterated  $\text{DMSO-D}_6$ .

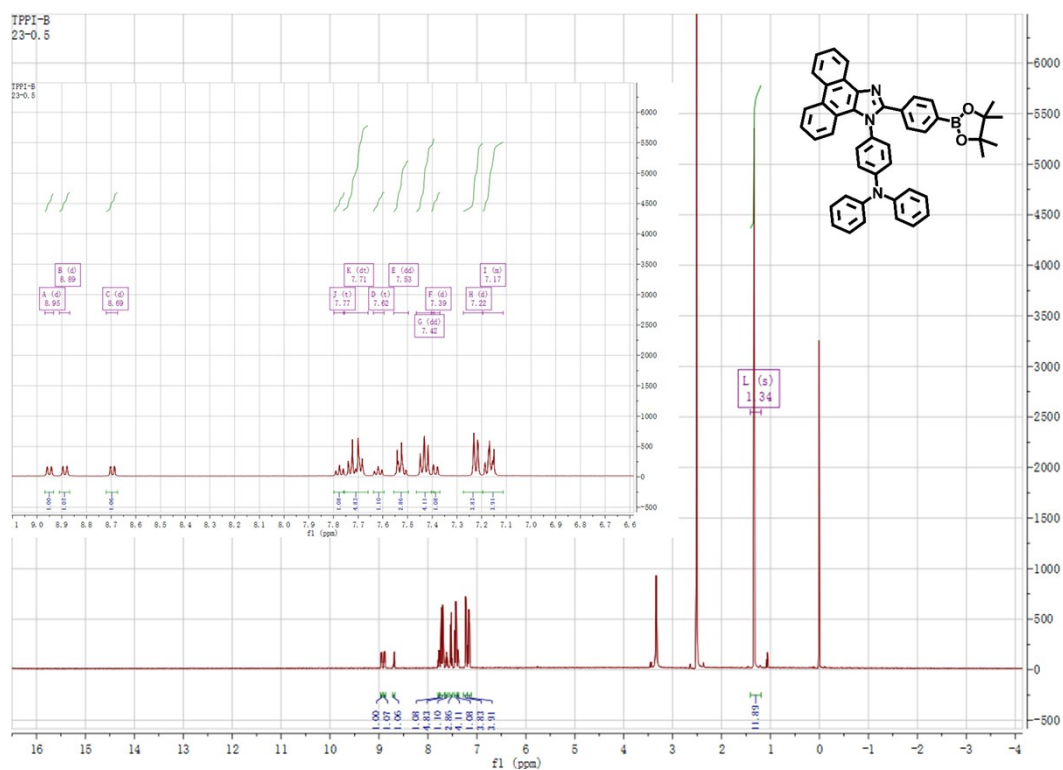

**Fig. S3**  $^1\text{H}$  NMR spectra of TPPI-B measured in deuterated  $\text{DMSO-D}_6$ .

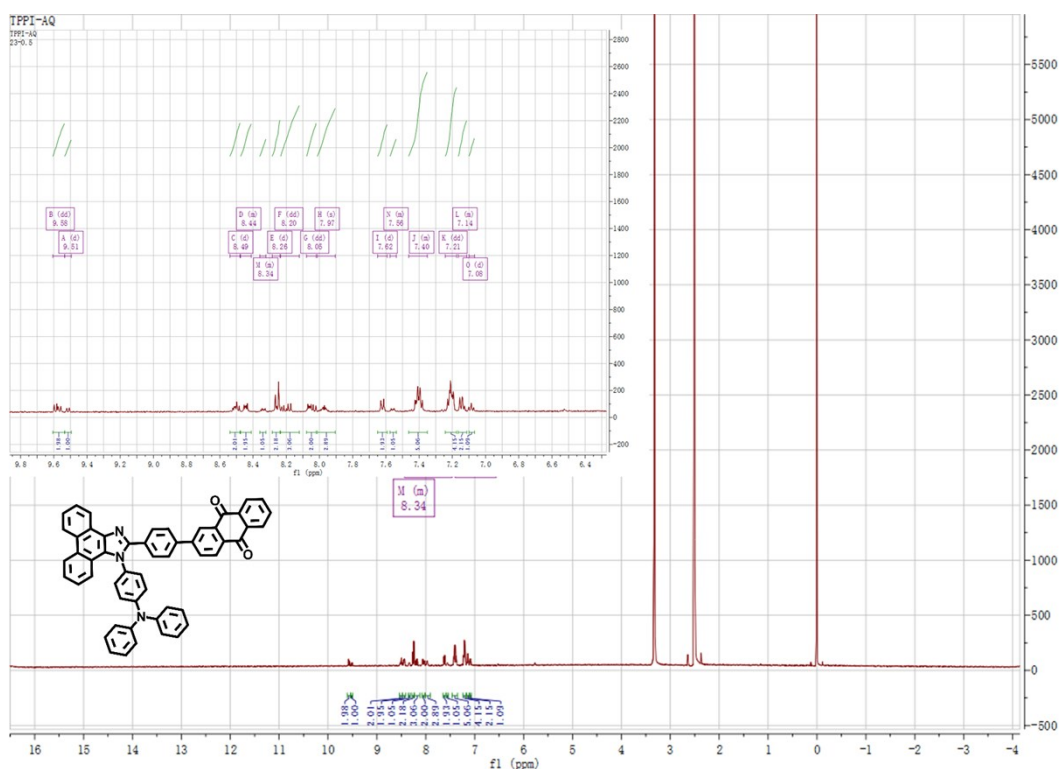

**Fig. S4**  $^1\text{H}$  NMR spectra of TPPI-AQ measured in deuterated  $\text{DMSO-D}_6$ .



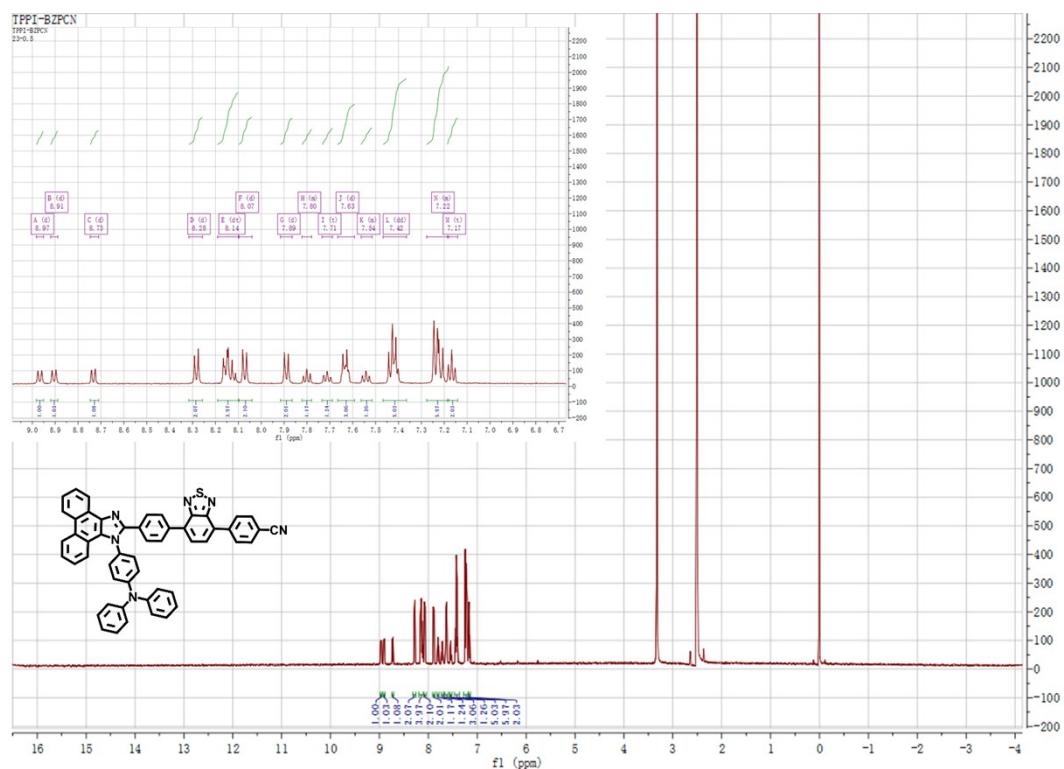

**Fig. S5**  $^1\text{H}$  NMR spectra of TPPI-BZPCN measured in deuterated DMSO- $\text{D}_6$ .

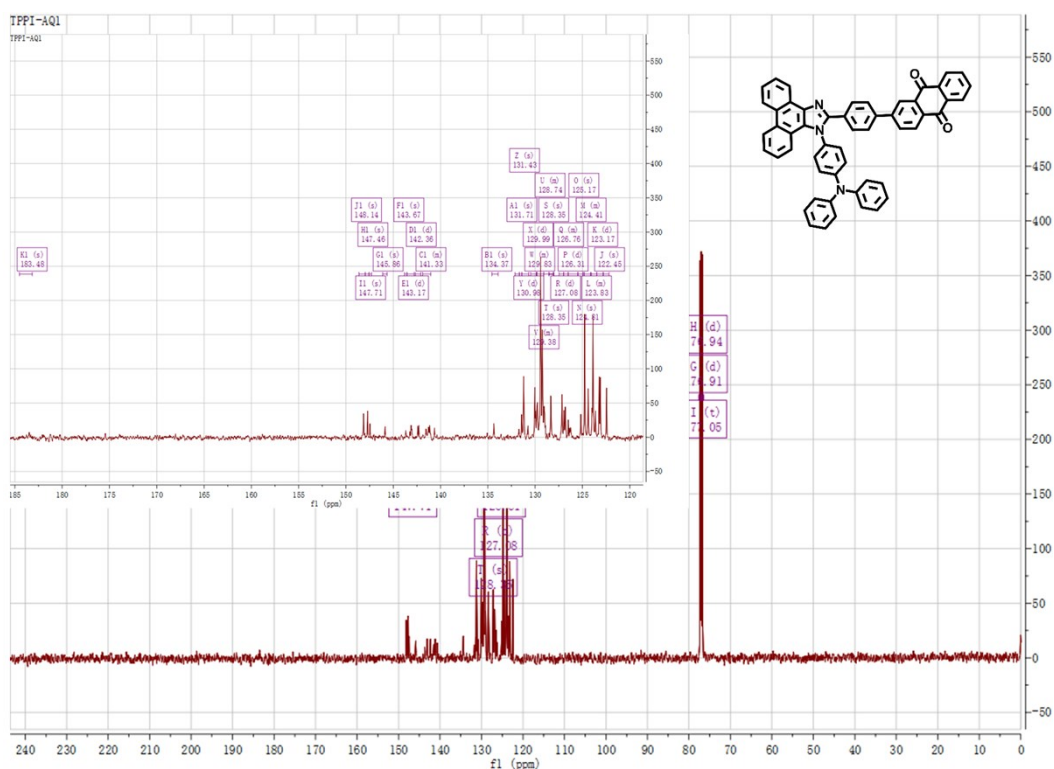

**Fig. S6**  $^{13}\text{C}$  NMR spectrums of TPPI-AQ measured in deuterated  $\text{CD}_2\text{Cl}_2$ .

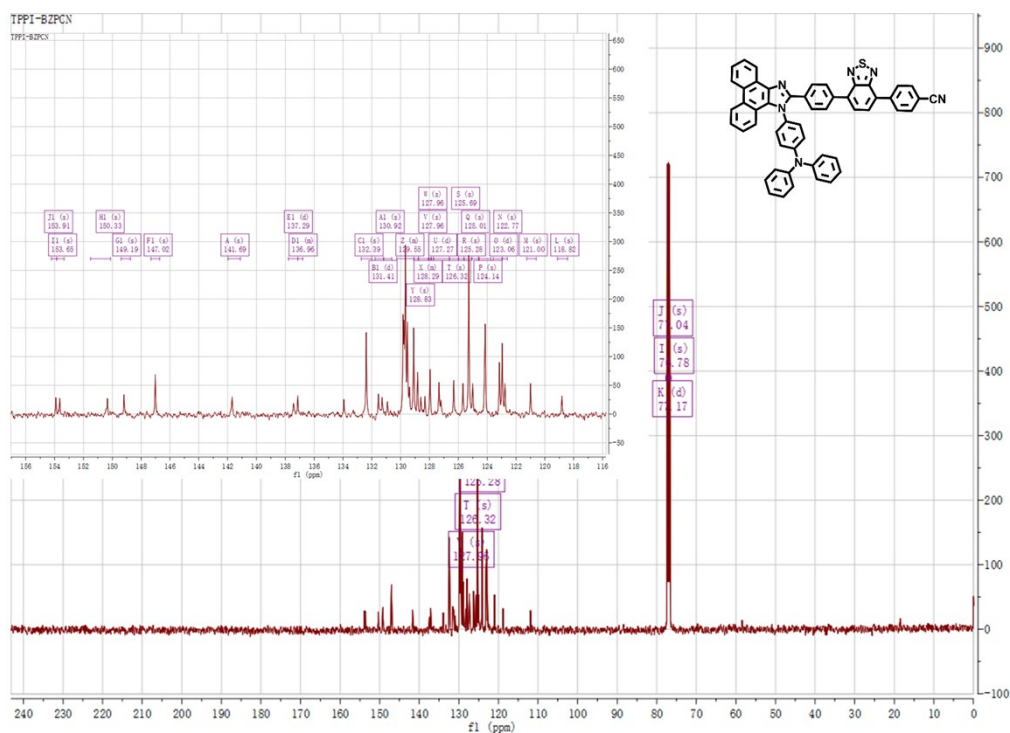

Fig. S7  $^{13}\text{C}$  NMR spectra of TPPI-BZPCN measured in deuterated  $\text{CD}_2\text{Cl}_2$ .

### 3. Photophysical Properties

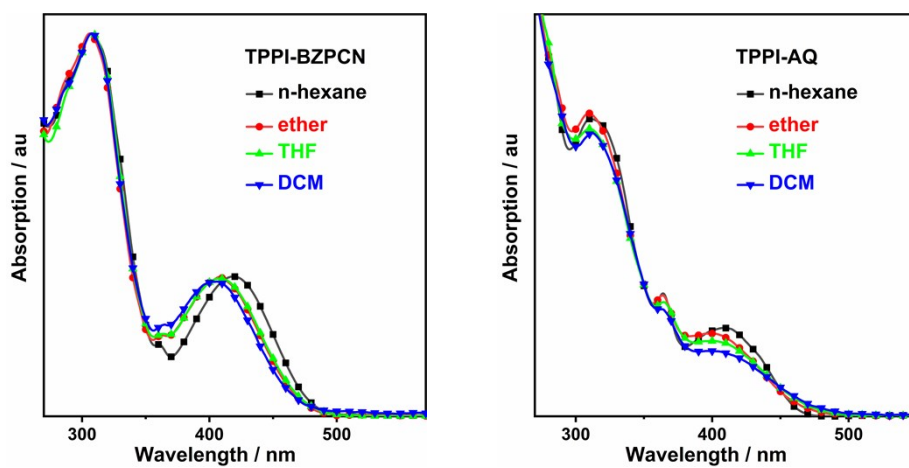

Fig. S8 Solvation effects on UV/vis absorption of TPPI-BZPCN and TPPI-AQ.

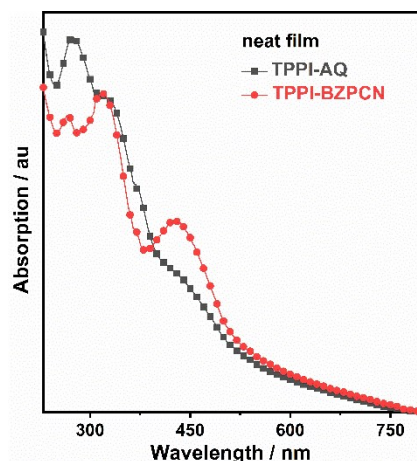

**Fig. S9** Absorption of TPPI-BZPCN and TPPI-AQ neat film.

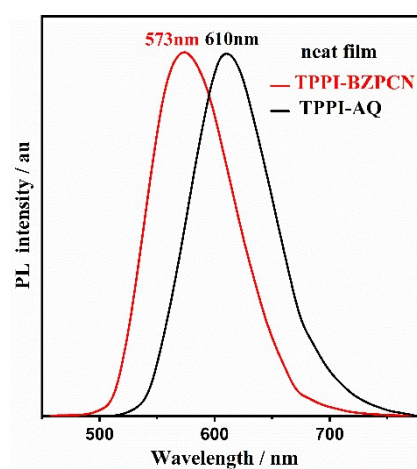

**Fig. S10** PL spectra of TPPI-BZPCN and TPPI-AQ in vacuum evaporated film.

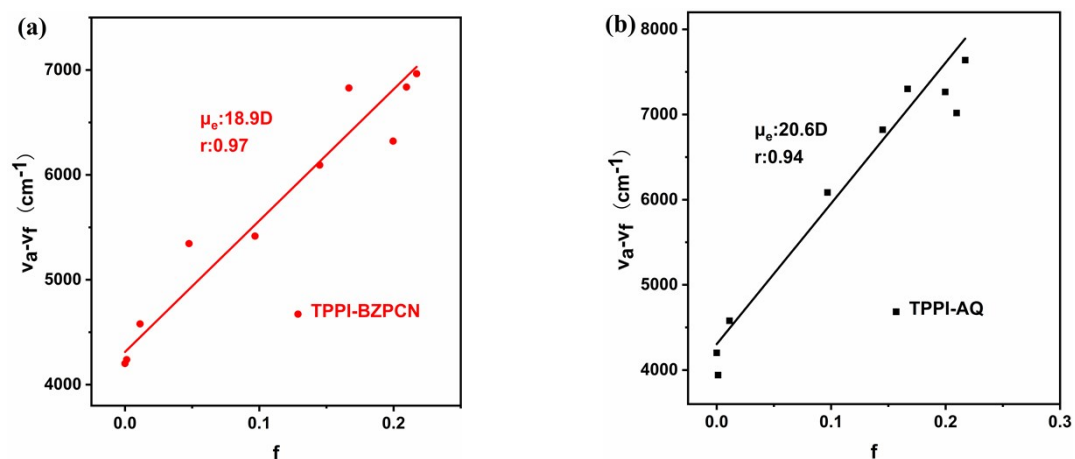

**Fig. S11** Linear correlation of orientation polarization ( $f$ ) of solvent media with the Stokes shift ( $\nu_a - \nu_f$ ); a: absorbed light; f: fluorescence for TPPI-BZPCN (a) and TPPI-AQ (b) (Table S1 for the solvents and corresponding data).

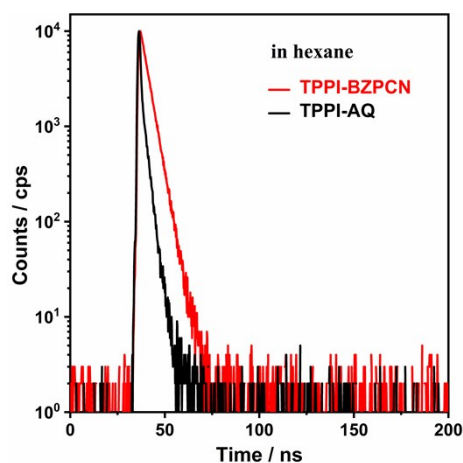

**Fig. S12** Transient photoluminescence decay measurement of TPPI-BZPCN and TPPI-AQ in hexane solution.

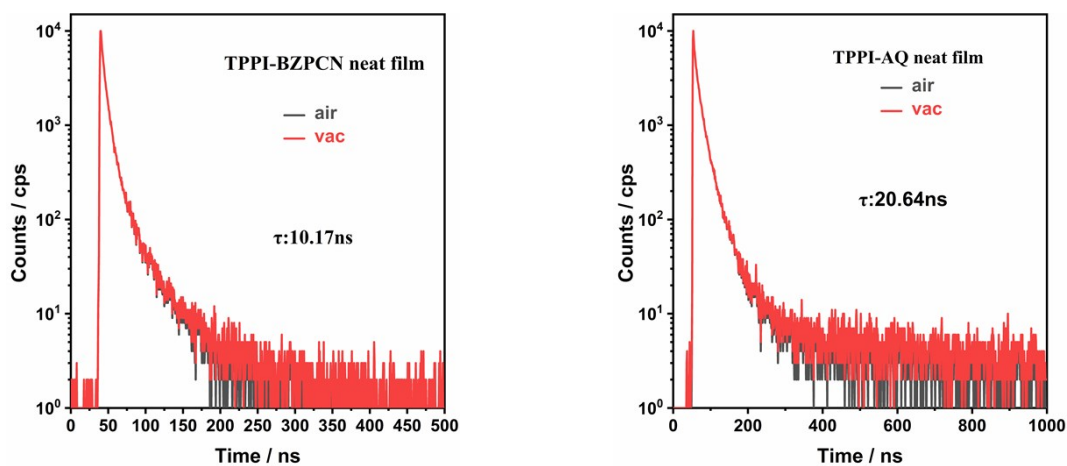

**Fig. S13** Transient photoluminescence decay measurement of TPPI-BZPCN and TPPI-AQ in neat film under air and degassed condition.

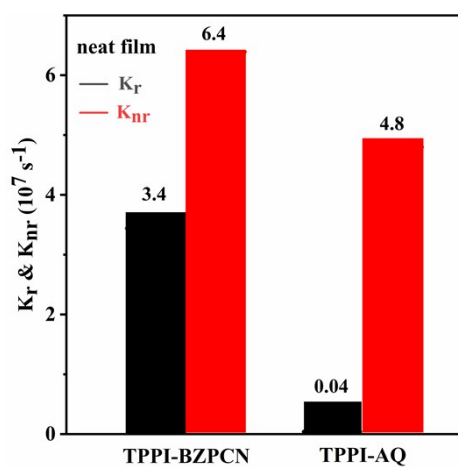

**Fig. S14** Radiative transition rates ( $k_r$ ) and non-radiative transition rates ( $k_{nr}$ ) of TPPI-BZPCN and TPPI-AQ in neat film.

**Table S1** Detailed photophysical data of TPPI-BZPCN and TPPI-AQ in different solvents.

| Solvents           | f (ε, n) | Φ <sub>F</sub> | TPPI-BZPCN            |                      |                                                    |
|--------------------|----------|----------------|-----------------------|----------------------|----------------------------------------------------|
|                    |          |                | λ <sub>abs</sub> (nm) | λ <sub>em</sub> (nm) | ν <sub>a</sub> -ν <sub>f</sub> (cm <sup>-1</sup> ) |
| Hexane             | ~ 0      | 0.50           | 418                   | 508                  | 4238                                               |
| Cyclohexane        | ~ 0      | 0.39           | 420                   | 510                  | 4202                                               |
| Tetrachloromethane | 0.011    | 0.40           | 420                   | 520                  | 4579                                               |
| Triethylamine      | 0.048    | 0.38           | 416                   | 530                  | 5345                                               |
| Butyl ether        | 0.096    | 0.34           | 408                   | 537                  | 5416                                               |
| Isopropyl ether    | 0.145    | 0.30           | 407                   | 543                  | 6093                                               |
| Ethyl ether        | 0.167    | 0.32           | 405                   | 548                  | 6828                                               |
| Ethyl acetate      | 0.200    | 0.06           | 410                   | 556                  | 6321                                               |
| Tetrahydrofuran    | 0.210    | 0.06           | 405                   | 562                  | 6836                                               |
| Methylene chloride | 0.217    | 0.05           | 410                   | 568                  | 6964                                               |
| Dimethyl formamide | 0.276    | ~ 0            | 405                   | n.d                  | --                                                 |
| Acetone            | 0.284    | ~ 0            | 404                   | n.d                  | --                                                 |
| Acetonitrile       | 0.305    | ~ 0            | 395                   | n.d                  | --                                                 |

  

| Solvents           | f (ε, n) | Φ <sub>F</sub> | TPPI-AQ               |                      |                                                    |
|--------------------|----------|----------------|-----------------------|----------------------|----------------------------------------------------|
|                    |          |                | λ <sub>abs</sub> (nm) | λ <sub>em</sub> (nm) | ν <sub>a</sub> -ν <sub>f</sub> (cm <sup>-1</sup> ) |
| Hexane             | ~ 0      | 0.05           | 410                   | 489                  | 3940                                               |
| Cyclohexane        | ~ 0      | 0.04           | 412                   | 485                  | 3653                                               |
| Tetrachloromethane | 0.011    | 0.03           | 412                   | 522                  | 5114                                               |
| Triethylamine      | 0.048    | 0.02           | 406                   | 543                  | 6275                                               |
| Butyl ether        | 0.096    | 0.02           | 407                   | 541                  | 6085                                               |
| Isopropyl ether    | 0.145    | 0.03           | 403                   | 552                  | 6821                                               |
| Ethyl ether        | 0.167    | ~ 0            | 400                   | 553                  | 7300                                               |
| Ethyl acetate      | 0.200    | ~ 0            | 405                   | 552                  | 7264                                               |
| Tetrahydrofuran    | 0.210    | ~ 0            | 406                   | 560                  | 7018                                               |
| Methylene chloride | 0.217    | ~ 0            | 409                   | 576                  | 7638                                               |
| Dimethyl formamide | 0.276    | ~ 0            | 397                   | n.d                  | --                                                 |
| Acetone            | 0.284    | ~ 0            | 399                   | n.d                  | --                                                 |
| Acetonitrile       | 0.305    | ~ 0            | 401                   | n.d                  | --                                                 |

λ<sub>abs</sub>: absorption maximum; λ<sub>em</sub>: emission maximum; Φ<sub>F</sub>: fluorescence quantum yield estimated by using quinoline sulfate as standard (Φ<sub>F</sub> = 54.6% in 0.1 M sulfuric acid solution), and n.d = not detectable (signal too weak to be accurately determined).

## 4. Theoretical Calculations

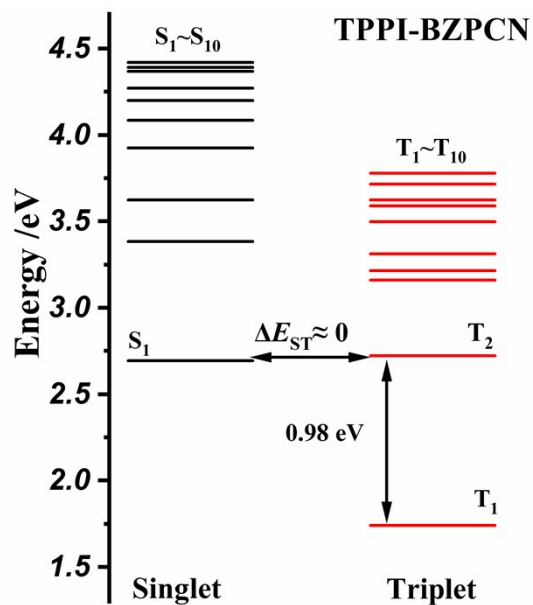

**Fig. S15** Excited state (singlet and triplet) energy diagram of TPPI-BZPCN at the geometry of  $S_1$  state.

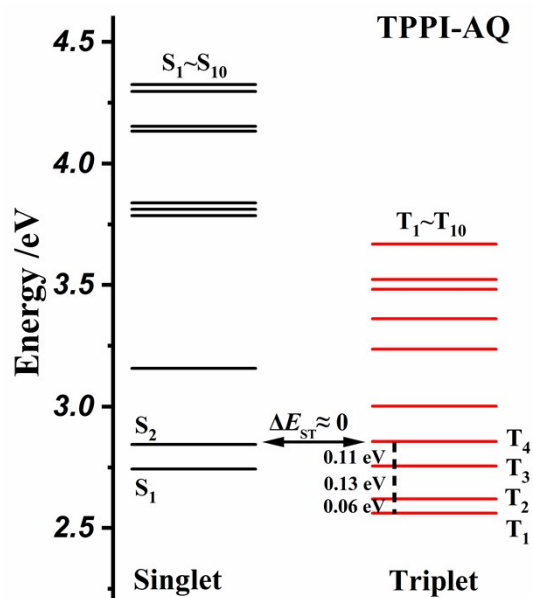

**Fig. S16** Excited state (singlet and triplet) energy diagram of TPPI-AQ at the geometry of  $S_1$  state.

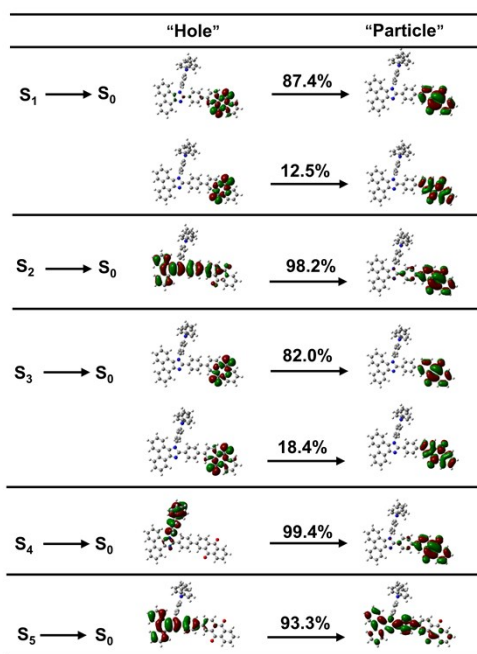

**Fig. S17** Natural transition orbitals of TPPI-AQ singlet excited states ( $S_1$  to  $S_5$ ).

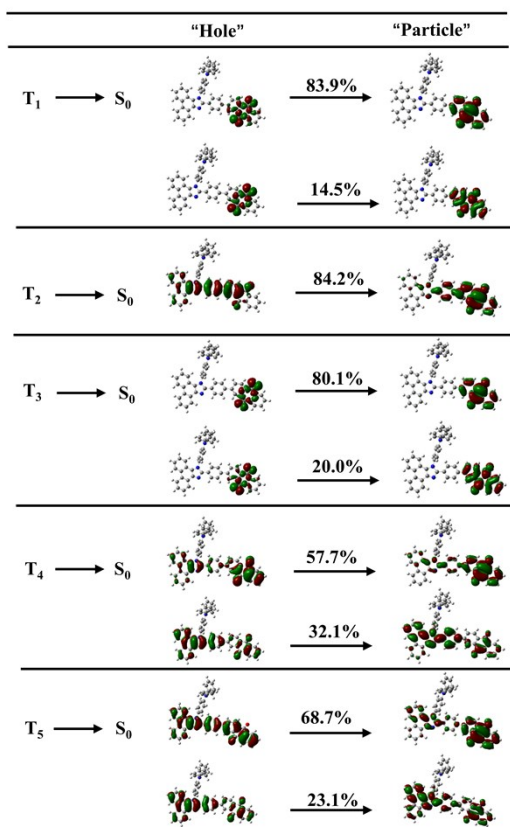

**Fig. S18** Natural transition orbitals of TPPI-AQ triplet excited states ( $T_1$  to  $T_5$ ).

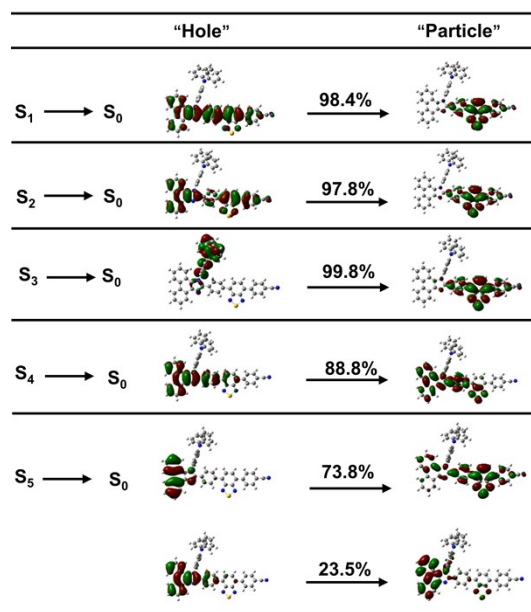

**Fig. S19** Natural transition orbitals of TPPI-BZPCN singlet excited states ( $S_1$  to  $S_5$ ).

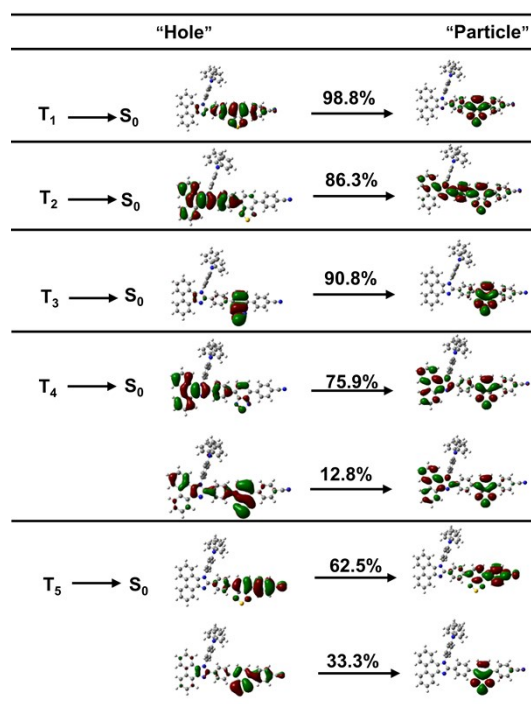

**Fig. S20** Natural transition orbitals of TPPI-BZPCN triplet excited states ( $T_1$  to  $T_5$ ).



**Table S2** Energy level, singlet and triplet states of TPPI-BZPCN and TPPI-AQ.

| Excited States | TPPI-BZPCN |        | TPPI-AQ |        |
|----------------|------------|--------|---------|--------|
|                | S (eV)     | T (eV) | S (eV)  | T (eV) |
| 1              | 2.6930     | 1.7395 | 2.7440  | 2.5612 |
| 2              | 3.3842     | 2.7222 | 2.8445  | 2.6204 |
| 3              | 3.6229     | 3.1591 | 3.1579  | 2.7549 |
| 4              | 3.9243     | 3.2159 | 3.7855  | 2.8571 |
| 5              | 4.0856     | 3.3129 | 3.8113  | 3.0014 |

## 5. Electroluminescence Property

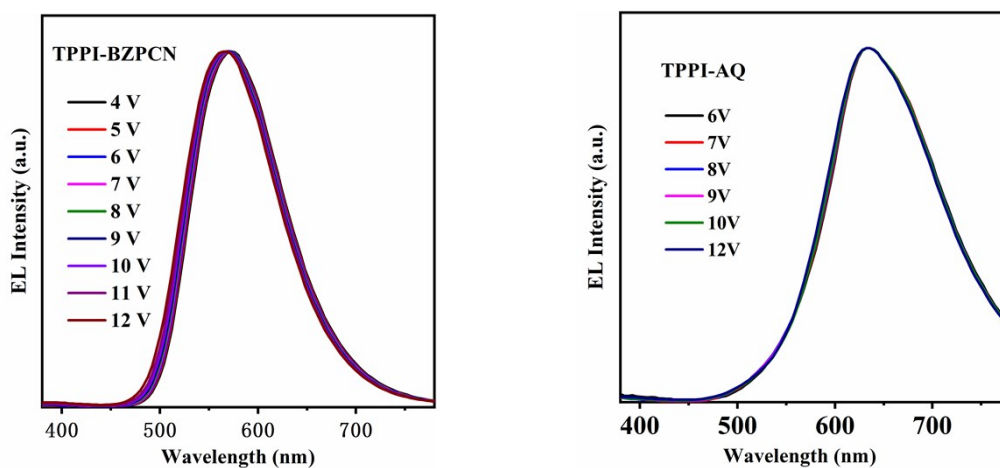**Fig. S21** Normalized EL spectra of non-doped devices based on TPPI-BZPCN and TPPI-AQ at different voltages.

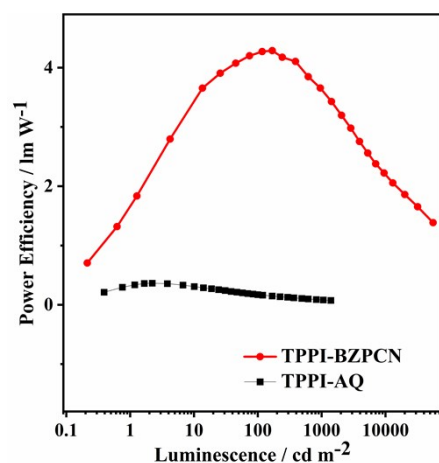

**Fig. S22** Power efficiencies versus luminance curves of non-doped devices based on TPPI-BZPCN and TPPI-AQ.
